# Supplementary material for: Hendra Virus Infection in Dog, Australia, 2013
Source: PubMed Central journal article supplement (PMC4672422; doi:10.3201/eid2112.151324), 2015-12
Supplement: 15-1324-Techapp-s1.pdf [file 15-1324-Techapp-s1.pdf]

# Hendra Virus Infection in Dog, Australia, 2013

## Technical Appendix

### Laboratory Methods

#### Serology and Virology

Antibodies to Hendra virus were detected in an ELISA (1) using peroxidase conjugated anti-equine IgG for horse serum and a recombinant protein A/G conjugate for other species or by virus neutralisation test (1). Virus isolation was attempted by culture of blood or tissue samples on Vero cells (1).

#### Histopathology

Tissues were collected and fixed in 10% neutral buffered saline before routine histological processing and staining with hematoxylin and eosin using standard techniques.

#### Immunohistochemistry

Immunoperoxidase staining was carried out using a rabbit polyclonal antibody raised against the Nipah virus N protein (2)

#### Detection of viral RNA

RNA encoding the M gene of HeV was detected by the use of a real time reverse transcription polymerase chain reaction (qRT-PCR) assay (3). To avoid the generation of aerosols during the extraction of RNA from fresh tissue samples, small fragments ( $\approx 15$ – $20$ mg) of tissue were digested enzymatically (4). Total nucleic acid was purified from 25 $\mu$ L of whole unclotted blood and the supernatant from tissue digests or 50 $\mu$ L of viral transport medium from swabs and serum using an RNA extraction kit (MagMax 96 viral RNA, Ambion, Austin, Texas) on a magnetic particle handling system (Kingfisher, Thermo, Finland) according to the manufacturer's instructions. Five microliters of purified nucleic acid was added to 20 $\mu$ L of AgPath (Ambion, Austin, Texas) mastermix and run on a thermocycler (ABI 7500, Applied Biosystems, Foster City, California) for 45 cycles under standard cycling conditions. Results were expressed as cycle-threshold units.

## References

1. Daniels P, Ksiazek T, Eaton BT. Laboratory diagnosis of Nipah and Hendra virus infections. *Microbes Infect.* 2001;3:289–95. [PubMed](#) [http://dx.doi.org/10.1016/S1286-4579\(01\)01382-X](http://dx.doi.org/10.1016/S1286-4579(01)01382-X)
2. Middleton DJ, Westbury HA, Morrissy CJ, van der Heide BM, Russell GM, Braun MA, et al. Experimental Nipah virus infection in pigs and cats. *J Comp Pathol.* 2002;126:124–36. [PubMed](#) <http://dx.doi.org/10.1053/jcpa.2001.0532>
3. Smith IL, Halpin K, Warrilow D, Smith GA. Development of a fluorogenic RT-PCR assay (TaqMan) for the detection of Hendra virus. *J Virol Methods.* 2001;98:33–40. [PubMed](#) [http://dx.doi.org/10.1016/S0166-0934\(01\)00354-8](http://dx.doi.org/10.1016/S0166-0934(01)00354-8)
4. Jenkins C, Hick P, Gabor M, Spiers Z, Fell SA, Gu X, et al. Identification and characterisation of an ostreid herpesvirus-1 microvariant (OsHV-1 micro-var) in *Crassostrea gigas* (Pacific oysters) in Australia. *Dis Aquat Organ.* 2013;105:109–26. [PubMed](#) <http://dx.doi.org/10.3354/dao02623>
